# Supplementary material for: Reactivity-matched synthesis of monodisperse Ag(In,Ga)S2 QDs with efficient luminescence
Source: Royal Society of Chemistry journal article supplement (doi:10.1039/d4nr00804a), 2024-01-01
Supplement: d4nr00804a1.pdf [file d4nr00804a1.pdf]

## Supplementary Information

### Reactivity-Matched Synthesis of Monodisperse Ag(In,Ga)S<sub>2</sub> QDs with Efficient Luminescence

Naiwei Wei<sup>1,2</sup>, Hong Zhu<sup>1,2</sup>, Danni Yan<sup>1,2</sup>, Shuai Yang<sup>1,2</sup>, Lili Xu<sup>1,2</sup>, Shengli Zhang<sup>1,2</sup>, and Yuhui Dong<sup>1,2,\*</sup>, Yousheng Zou<sup>1,2,\*</sup>, Haibo Zeng<sup>1,2,\*</sup>

*<sup>1</sup>Institute of Optoelectronics & Nanomaterials, College of Materials Science and Engineering, Nanjing University of Science and Technology, Nanjing 210094, China*

*<sup>2</sup>Key Laboratory of Advanced Display Materials and Devices, Ministry of Industry and Information Technology, Nanjing 210094, China*

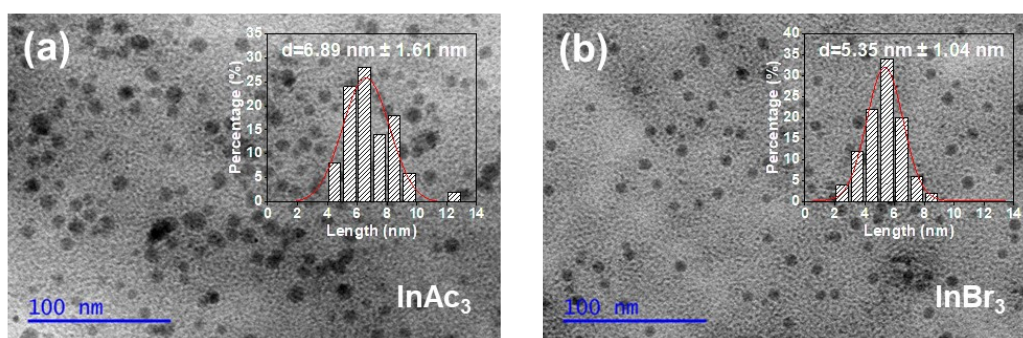

Fig. S1 TEM images and the corresponding size distribution histograms of the AIGS QDs synthesized using  $\text{InAc}_3$  and  $\text{InBr}_3$ , respectively.

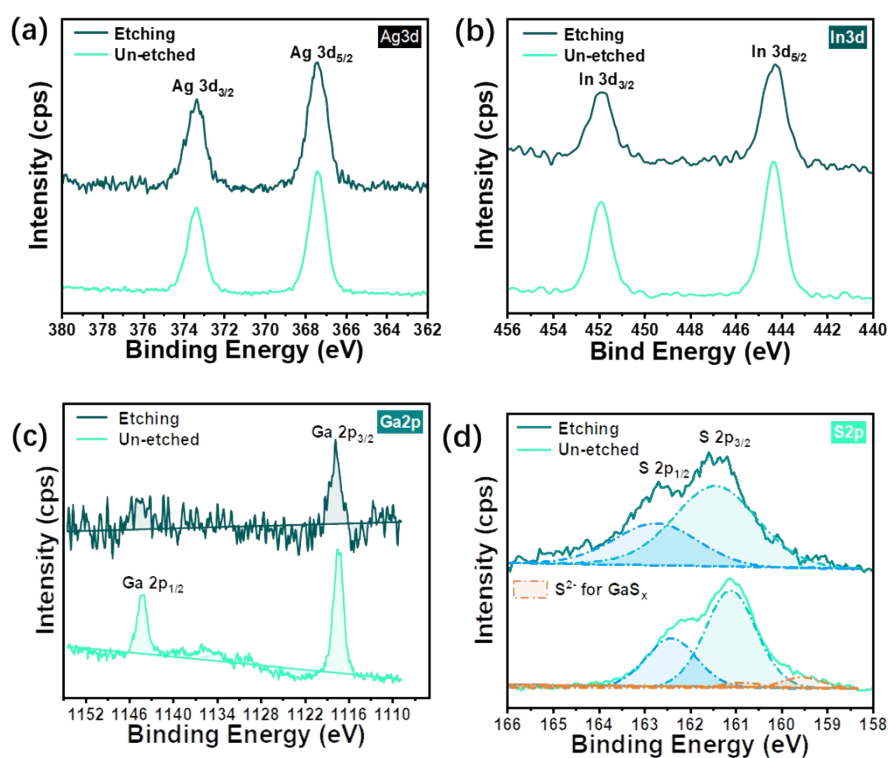

Fig. S2 XPS spectra of AIGS@ $\text{GaS}_x$  core/shell QDs for (a) Ag 3d, (b) In 3d, (c) Ga 2p, and (d) S 2p regions synthesized using  $\text{InI}_3$  before and after etching.

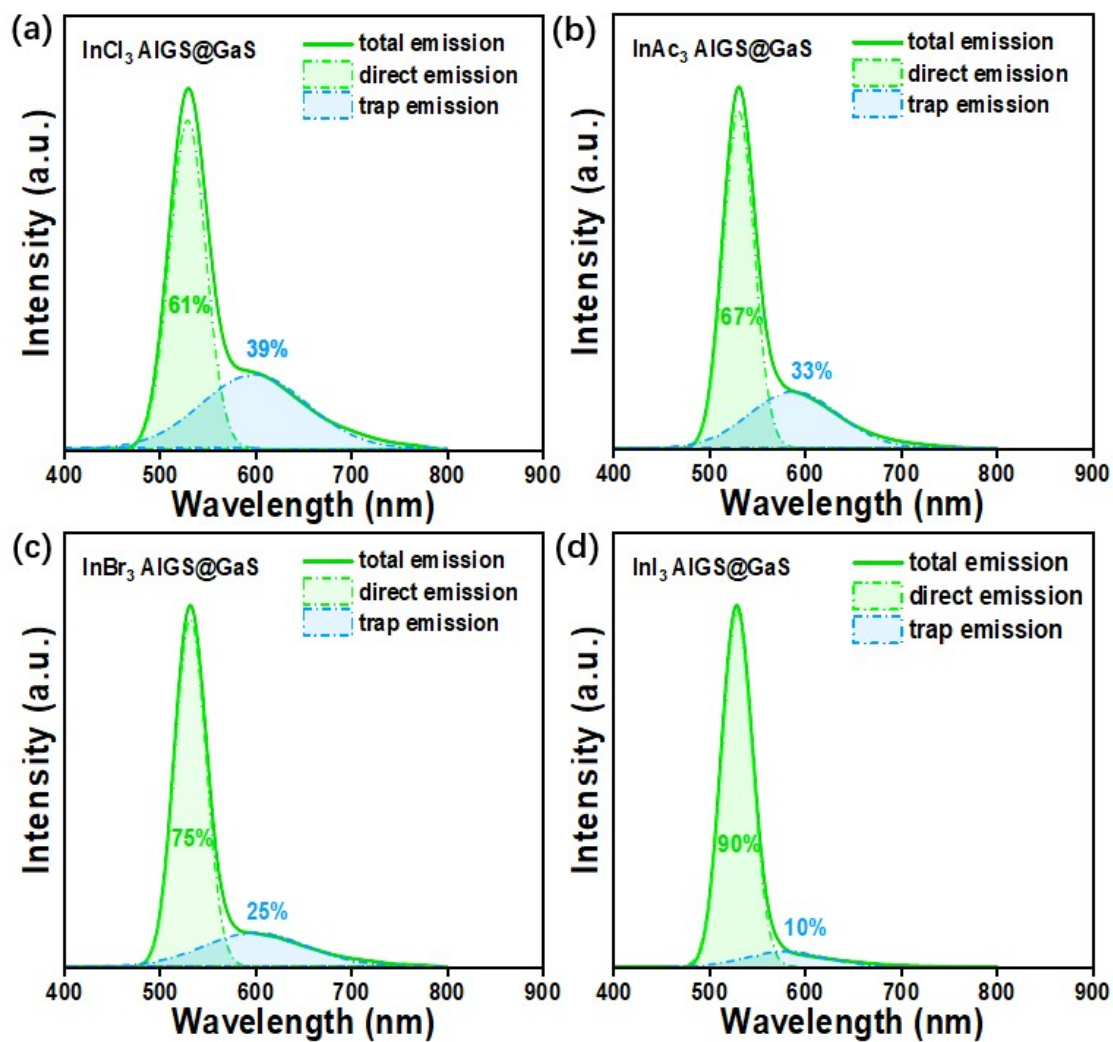

Fig. S3 Fitted PL spectra of the AIGS QDs synthesized using (a)  $\text{InCl}_3$ , (b)  $\text{InAc}_3$ , (c)  $\text{InBr}_3$ , and (d)  $\text{InI}_3$ , respectively.

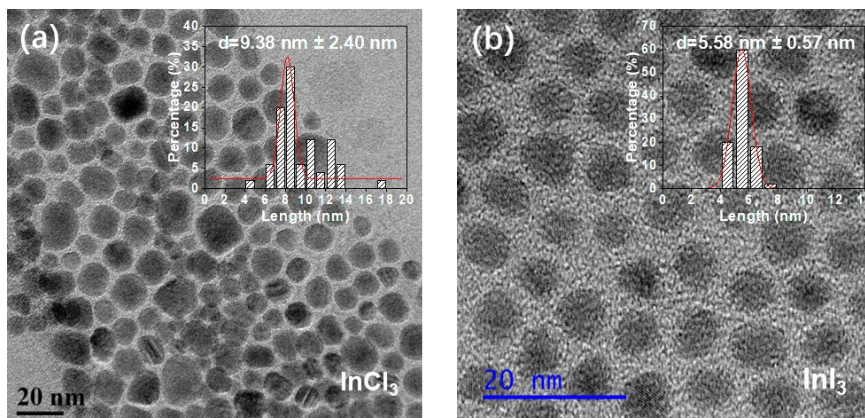

Fig. S4 TEM images of the AIGS@GaS<sub>x</sub> QDs synthesized using InCl<sub>3</sub> and InI<sub>3</sub>, respectively.

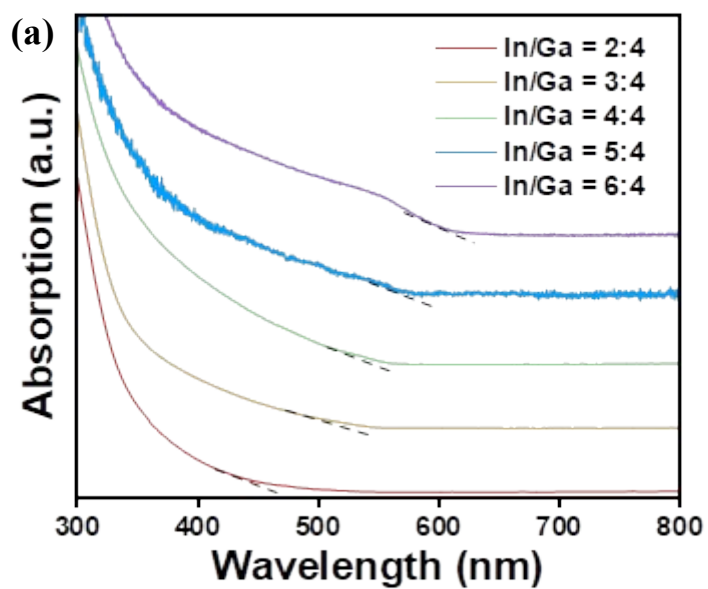

Fig. S5 Absorption curves of AIGS@GaS<sub>x</sub> core/shell QDs with different In/Ga ratios.

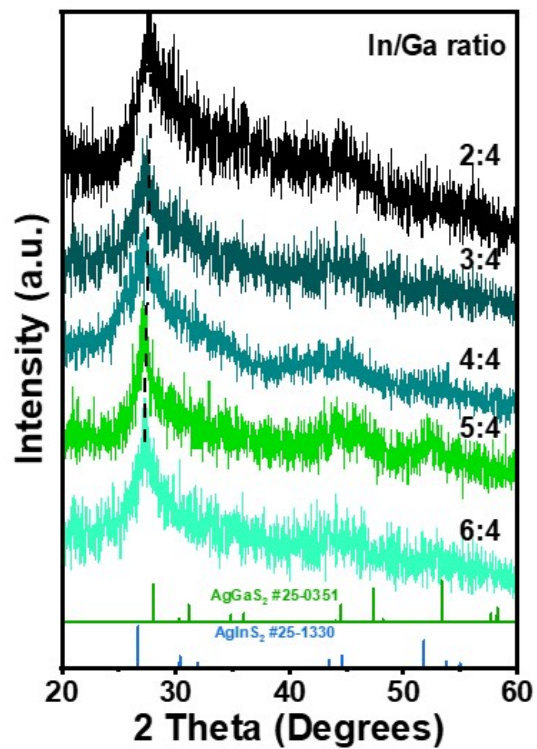

Fig. S6 XRD spectra of the AIGS/GaS<sub>x</sub> core/shell QDs with In/Ga molar ratios of 2:4, 3:4, 4:4, 5:4, and 6:4 synthesized with the same metal salt InI<sub>3</sub>.

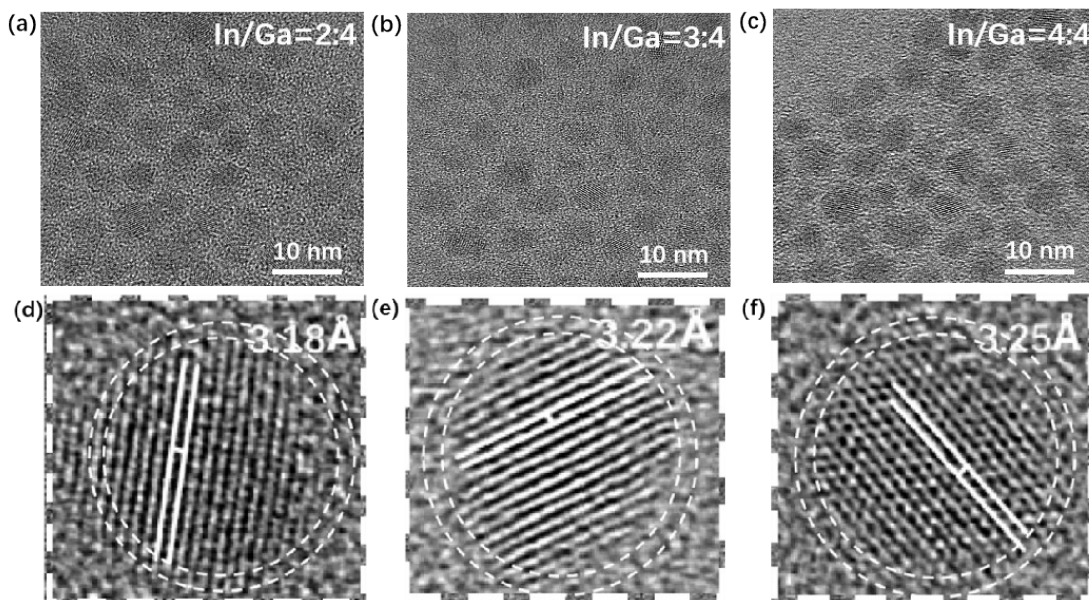

Fig. S7 TEM image of the AIGS/GaS<sub>x</sub> core/shell QDs with In/Ga molar ratios of (a) 2:4, (b) 3:4, (c) 4:4, HRTEM image of the AIGS/GaS<sub>x</sub> core/shell QDs with In/Ga molar ratios of (d) 2:4, (e) 3:4, and (f) 4:4.



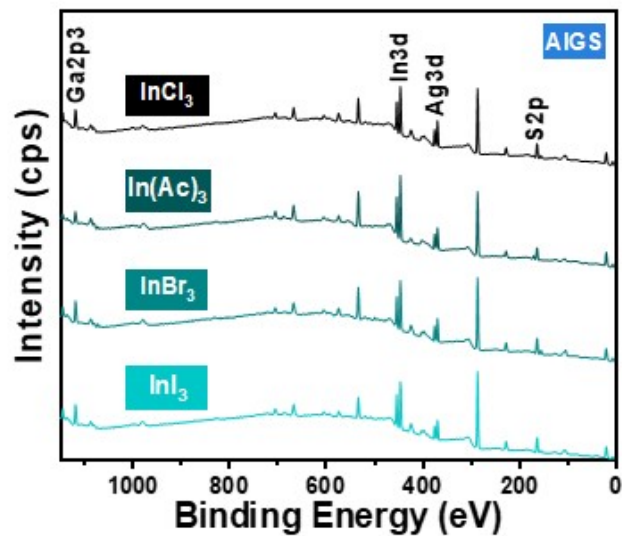

Fig. S8 XPS spectra of AIGS QDs synthesized using  $\text{InCl}_3$ ,  $\text{InAc}_3$ ,  $\text{InBr}_3$ , and  $\text{InI}_3$ , respectively.

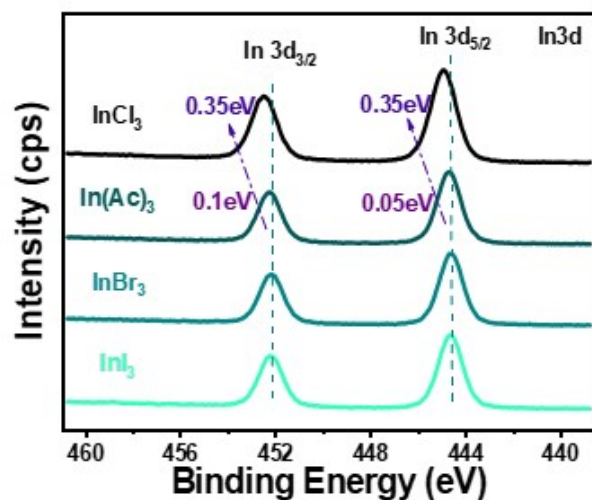

Fig. S9 XPS spectra of AIGS QDs for In 3d regions synthesized using different In sources.

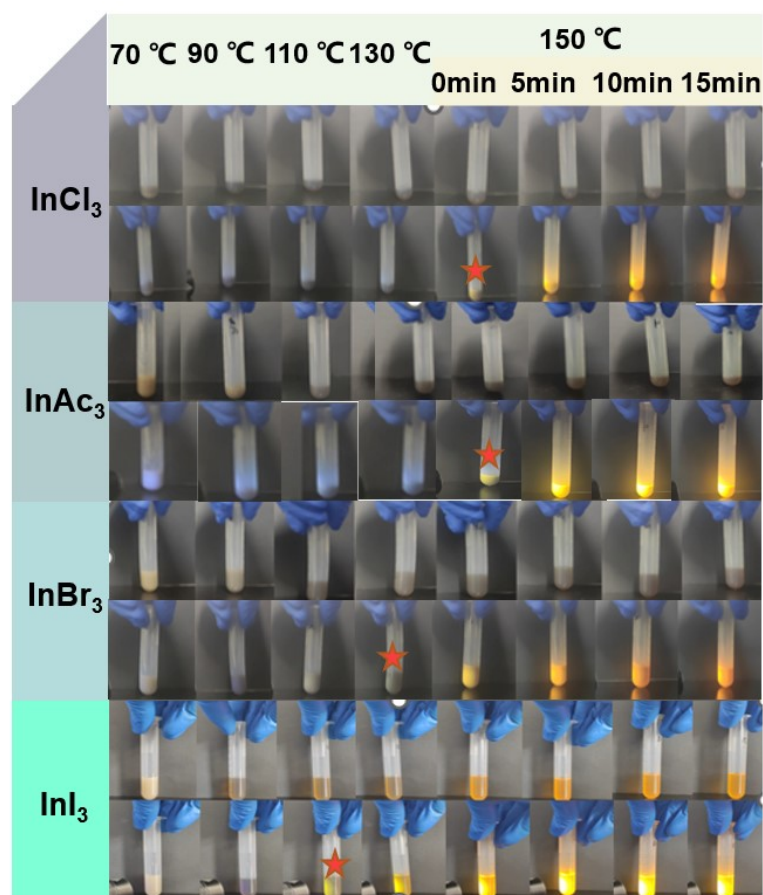

Fig. S10 Photographs for reaction stage under white light (upper photos) and UV light (bottom photos) extracts from 70 °C to 150 °C 15 min of AIGS QDs synthesized using  $\text{InCl}_3$ ,  $\text{InAc}_3$ ,  $\text{InBr}_3$ , and  $\text{InI}_3$ , respectively.

Table S1. Elements Hard and Soft Acid and Base (HSAB) diagram.

| Acid \ Base | Base             | Hard base                                 | Junction base          | Soft base    |
|-------------|------------------|-------------------------------------------|------------------------|--------------|
|             |                  | $\text{CH}_3\text{COO}^-$ 、 $\text{Cl}^-$ | $\text{Br}^-$          | $\text{I}^-$ |
| Hard acid   | $\text{In}^{3+}$ | Strong bond                               | Relatively strong bond | Weak bond    |

Table S2. Calculated bond formation energies from  $\text{In}(\text{A})_3$  to  $\text{In}^{3+}$  ( $\text{A} = \text{Cl}^-$ ,  $\text{Ac}^-$ ,

Br, I-)

|                   | InCl <sub>3</sub> | InAc <sub>3</sub> | InBr <sub>3</sub> | InI <sub>3</sub> |
|-------------------|-------------------|-------------------|-------------------|------------------|
| E <sub>form</sub> | 1.01 eV           | 2.59 eV           | 0.86 eV           | 0.50 eV          |

Table S3. Average lifetimes and radiative composite and nonradiative occupancies of AIGS QDs synthesized using InCl<sub>3</sub>, InAc<sub>3</sub>, InBr<sub>3</sub>, and InI<sub>3</sub>, respectively.

| AIGS              | $\langle\tau_{av}\rangle$<br>(ns) | $\tau_1$<br>(ns) | $\tau_2$<br>(ns) | $f_1$  | $f_2$  |
|-------------------|-----------------------------------|------------------|------------------|--------|--------|
| InCl <sub>3</sub> | 177.92                            | 28.04            | 214.55           | 73.19% | 26.81% |
| InAc <sub>3</sub> | 175.41                            | 34.79            | 203.90           | 57.69% | 42.31% |
| InBr <sub>3</sub> | 181.94                            | 38.52            | 208.46           | 45.21% | 54.79% |
| InI <sub>3</sub>  | 197.24                            | 42.70            | 223.08           | 38.22% | 61.78% |

Table S4. Element atom % of QD and etch-QD analyzed by XPS.

| Sample  | Element atom % |      |       |          |       |
|---------|----------------|------|-------|----------|-------|
|         | Ag             | In   | Ga    | Ag+In+Ga | S     |
| QD      | 11.88          | 5.49 | 17.43 | 34.80    | 65.20 |
| Etch-QD | 18.18          | 9.09 | 5.84  | 33.11    | 66.89 |

Table S5. Average lifetimes and radiative composite and nonradiative occupancies



of AIGS@GaS<sub>x</sub> QDs synthesized using InCl<sub>3</sub>, InAc<sub>3</sub>, InBr<sub>3</sub>, and InI<sub>3</sub>, respectively.

| AIGS@GaS <sub>x</sub> | $\langle\tau_{av}\rangle$<br>(ns) | $\tau_1$<br>(ns) | $\tau_2$<br>(ns) | $\tau_3$<br>(ns) | $f_1$ | $f_2$  | $f_3$  |
|-----------------------|-----------------------------------|------------------|------------------|------------------|-------|--------|--------|
| InCl <sub>3</sub>     | 106.03                            | 6.89             | 41.83            | 207.60           | 5.01% | 33.37% | 61.62% |
| InAc <sub>3</sub>     | 99.01                             | 7.85             | 44.54            | 189.75           | 8.09% | 37.66% | 54.25% |
| InBr <sub>3</sub>     | 84.63                             | 5.92             | 35.51            | 133.64           | 7.45% | 46.38% | 46.17% |
| InI <sub>3</sub>      | 76.66                             | 4.35             | 26.86            | 157.10           | 8.55% | 54.69% | 36.76% |

Table S6. Summary of properties based on I-III-VI and derivative QDs.

| QDs                         | PL<br>(nm) | FWHM<br>(nm) | Colour            | PLQY<br>(%) | Ref              |
|-----------------------------|------------|--------------|-------------------|-------------|------------------|
| AIS@GaS <sub>x</sub>        | 600        | 30           | Yellow            | 56%         | 1                |
| AIS@GaS <sub>x</sub>        | ~580       | ~33          | Yellow            | 72.3        | 2                |
| AIS@GaS <sub>x</sub>        | 560        | 45           | Yellow            | 26.7        | 3                |
| AIS@GaS <sub>x</sub>        | 530        | ~37          | Green             | 40          | 4                |
| AIS@GaS@ZnS                 | 575        | ~48          | Yellow            | ~60         | 5                |
| AIGS@GaS <sub>x</sub>       | 530        | 41           | Pure-Green        | ~28         | 6                |
| AIGS@GaS <sub>x</sub>       | 568        | 36           | Yellow            | 71          | 7                |
| AIGS@GaS <sub>x</sub>       | 518        | 36           | Green             | 68          | 8                |
| AIGS@GaS <sub>x</sub>       | 543        | 37           | Green             | 99          | 9                |
| AIGS@GaS <sub>x</sub>       | 528        | 31           | Pure-Green        | 53          | 9                |
| AIGS@AGS                    | 517        | 30           | Green             | 96          | 10               |
| <b>AIGS@GaS<sub>x</sub></b> | <b>530</b> | <b>31</b>    | <b>Pure-Green</b> | <b>90</b>   | <b>This work</b> |

## References

- 1 T. Uematsu, K. Wajima, D. K. Sharma, S. Hirata, T. Yamamoto, T. Kameyama, M. Vacha, T. Torimoto, S. Kuwabata, *NPG Asia Mater.* 2018, **10**, 713.
- 2 W. Hoisang, T. Uematsu, T. Yamamoto, T. Torimoto, S. Kuwabata, *Nanomaterials*. 2019, **9**, 1763.
- 3 G. Motomura, K. Ogura, Y. Iwasaki, T. Uematsu, S. Kuwabata, T. Kameyama, T. Torimoto, T. Tsuzuki, *Appl. Phys. Lett.* 2020, **117**, 091101.
- 4 T. T. T. Huong, N. T. Loan, T. D. T. Ung, N. T. Tung, H. Han, N. Q. Liem, *Nanotech.* 2022, **33**, 355704.
- 5 N. T. Loan, T. T. T. Huong, M. A. Luong, L. Van Long, H. Han, T. D. T. Ung, N. Q. Liem, *Nanotech.* 2023, **34**, 315601.
- 6 T. Kameyama, M. Kishi, C. Miyamae, D. K. Sharma, S. Hirata, T. Yamamoto, T. Uematsu, M. Vacha, S. Kuwabata, T. Torimoto, *ACS Appl. Mater. Interfaces*. 2018, **10**, 42844.
- 7 W. Hoisang, T. Uematsu, T. Torimoto, S. Kuwabata, *Chem. Lett.* 2021, **50**, 1863.
- 8 W. Hoisang, T. Uematsu, T. Torimoto, S. Kuwabata, *Inorg. Chem.* 2021, **60**, 13101.
- 9 T. Uematsu, M. Tepakidareekul, T. Hirano, T. Torimoto, S. Kuwabata, *Chem. Mater.* 2023, **35**, 1094.
- 10 H. J. Lee, S. Im, D. Jung, K. Kim, J. A. Chae, J. Lim, J. W. Park, D. Shin, K. Char, B. G. Jeong, J.-S. Park, E. Hwang, D. C. Lee, Y.-S. Park, H.-J. Song, J. H. Chang, W. K. Bae, *Nat. Commun.* 2023, **14**, 3779.
